# Supplementary material
Source: PubMed Central journal article supplement (PMC4793841)

Distribution of spherical equivalent refractive error in the more myopic eye among rural children with uncorrected visual acuity  $\leq 6/12$  in at least one eye recruited into the trial

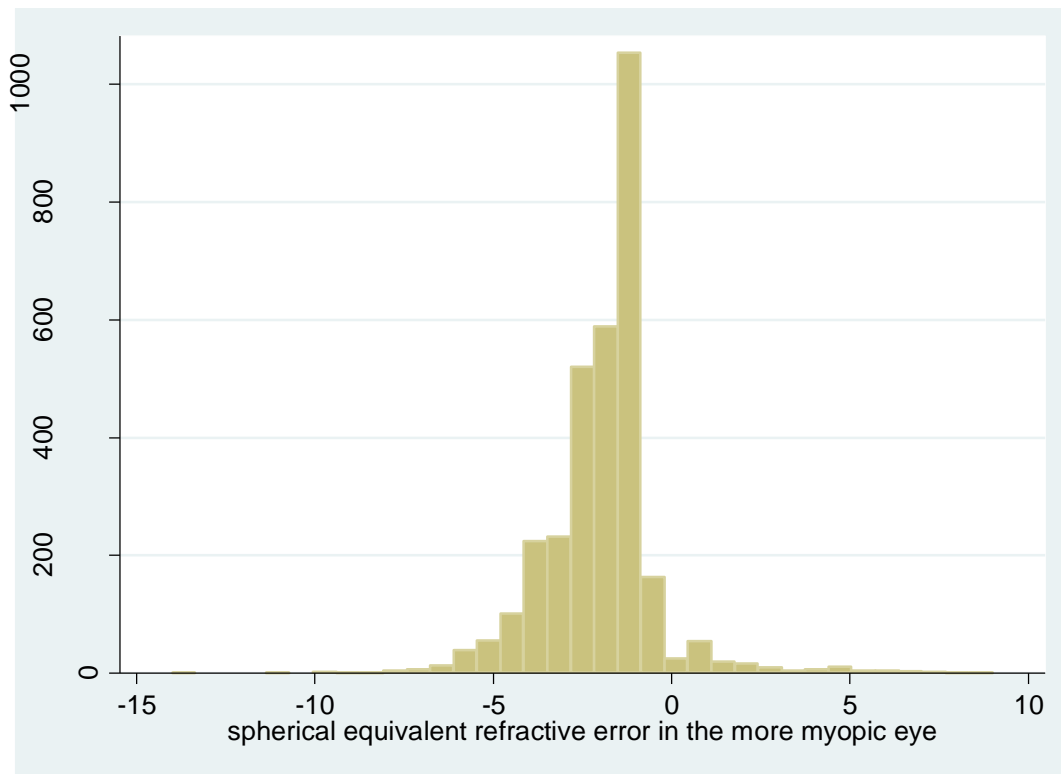

Supplement: max019598.wf1_default.pdf [file max019598.wf1_default.pdf]
